# Supplementary material for: Profiling tumour heterogeneity through circulating tumour DNA in patients with pancreatic cancer
Source: PubMed Central journal article supplement (PMC5675628; doi:10.18632/oncotarget.20250), 2017-08-14
Supplement: oncotarget-08-87221-s001.pdf [file oncotarget-08-87221-s001.pdf]

## **Profiling tumour heterogeneity through circulating tumour DNA in patients with pancreatic cancer**

### **SUPPLEMENTARY MATERIALS**

**Supplementary Table 1: Sample summary and clinicopathological criteria for all patients**

See Supplementary File 1

**Supplementary Table 2: Mutations identified in the cfDNA of healthy controls and CP patients by tNGS**

See Supplementary File 2

**Supplementary Table 3: Mutations identified in the cfDNA of PDAC patients by tNGS**

See Supplementary File 3

**Supplementary Table 4: Summary of the mutations identified in the matching cfDNA and tissue of PDAC patients by tNGS**

See Supplementary File 4

**Supplementary Table 5: Mutations identified in different tissue regions of PDAC patients by tNGS**

See Supplementary File 5
